# Supplementary material
Source: publisher figshare collection journal article supplement (https://acs.figshare.com/ndownloader/files/22121064)
Supplement: Supplementary file 1 [file 22121064]

## Supporting Information

# Rapid Detection of Carbapenemase-Producing Enterobacteriaceae Based on Surface-Enhanced Raman Spectroscopy with Gold Nanostars

*Yen Lynn Wong<sup>1</sup>, Wei Cherng Malvin Kang<sup>2</sup>, Miguel Reyes<sup>3†</sup>, Jeanette Woon Pei Teo<sup>4</sup>,*

*James Chen Yong Kah<sup>1,2\*</sup>*

<sup>1</sup>Department of Biomedical Engineering, National University of Singapore, 4  
Engineering Drive 3, Blk E4, #04-08, Singapore 117583.

<sup>2</sup>NUS Graduate School for Integrative Sciences and Engineering, National University of  
Singapore, University Hall, Tan Chin Tuan Wing, Level 04, #04-02, 21 Lower Kent Ridge,  
Singapore 119077.

<sup>3</sup>Department of Materials Science and Engineering, National University of Singapore, 9  
Engineering Drive 1, Blk EA, #03-09, Singapore 117575.

<sup>4</sup>Department of Laboratory Medicine, National University Health System, 1E Kent Ridge Road,  
Singapore 119228.

\*Corresponding Author. Email: [biekahj@nus.edu.sg](mailto:biekahj@nus.edu.sg)

Number of pages = 3

Number of figures = 2

Number of Tables = 1

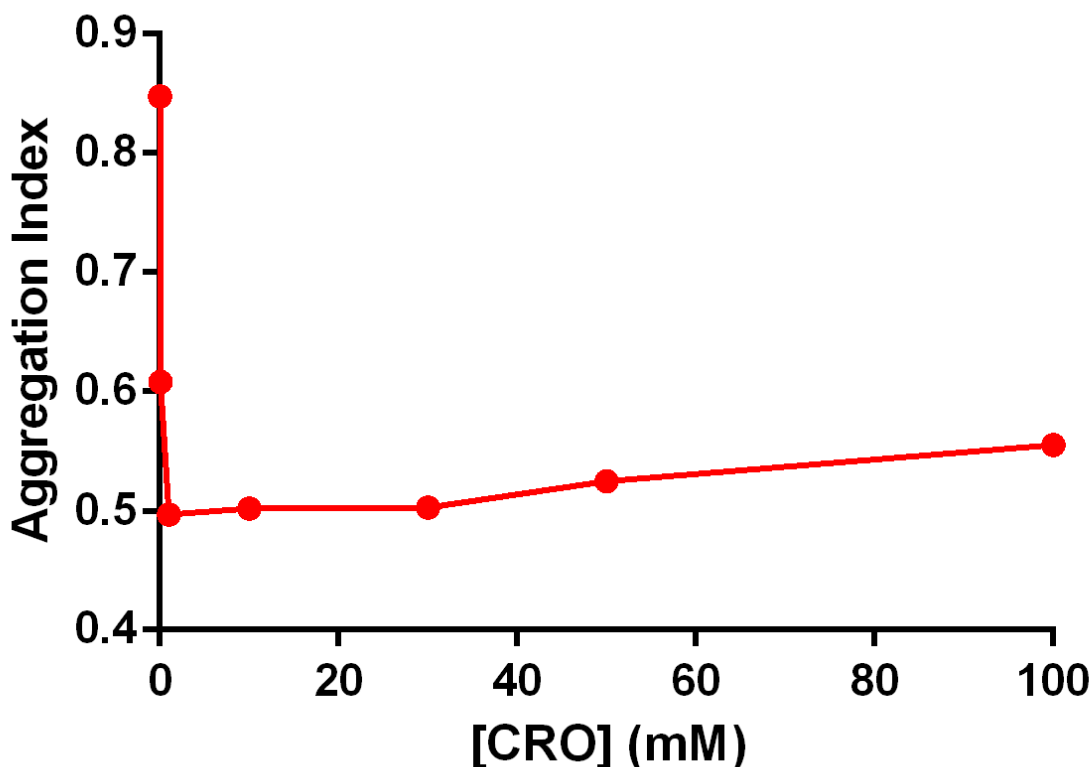

**Figure S1.** Determination of the minimum protective amount (MPA) of CRO needed to stably protect the gold nanostars against salt-induced aggregation from 0.5X PBS. Based on the UV-Vis spectra in Figure 2D, we utilized a quantitative method based on the aggregation index ( $AI = A_{500nm}/A_{700nm}$ ) of gold nanostars to determine the colloidal stability of AuNS-CRO at various CRO concentrations in the presence of 0.5X PBS salt to induce aggregation. The MPA was the minimum CRO concentration where the AI remained low. Here the  $A_{700nm}$  reduced in the presence of aggregation (Figure 2D) while normalizing this to  $A_{500nm}$  would remove concentration-dependent change in the absorbance. From our study, we obtained a minimum AI of  $\sim 0.5$  between 1 and 30 mM of CRO added to AuNS in 0.5X PBS. Any concentration of CRO outside of this range would result in AuNS aggregation at concentrations  $< 1$  mM or slightly higher AI for concentrations  $> 30$  mM. Hence, we chose 1 mM of CRO as our MPA.

| Incubation time<br>(min) | Control                                                                            | NDM producing<br><i>E. coli</i>                                                     | Non-NDM<br>producing <i>E. coli</i>                                                  |
|--------------------------|------------------------------------------------------------------------------------|-------------------------------------------------------------------------------------|--------------------------------------------------------------------------------------|
| 1                        |   |   |   |
| 10                       |   |   |   |
| 20                       |   |   |   |
| 45                       |  |  |  |

**Figure S2.** Modified Carba NP test was used to validate the effectiveness of the SERS assay. The Carba NP test is a commercially available test used clinically to probe for carbapenemase activity qualitatively through a color change from red to yellow. The reaction medium consisted of phenol red, which changed from red to yellow-orange at lower pH. Here, the presence of NDM+ *E. Coli* caused a color change from red to yellow (middle column) due to the hydrolysis of the  $\beta$ -lactam ring, which resulted in the release of  $H^+$  ions and acidification. This was not observed in NDM- *E. Coli* (right column). It was also important to note that the solutions were all maintained as red initially to rule out any possible pH effects from the two different *E. Coli* strains.

**Table S1.** Detailed assignment of peaks in the SERS spectra that are associated with changes in the SERS intensity due to the hydrolysis of CRO.

| SERS Peak (cm <sup>-1</sup> ) | Assignment                            |
|-------------------------------|---------------------------------------|
| 620, 1000, 1031               | Polystyrene Cuvettes                  |
| 722                           | Lactam Ring Breathing Vibration       |
| 1358                          | CH <sub>2</sub> Bending               |
| 1495                          | CH <sub>3</sub> Deformation Vibration |
